# Supplementary material
Source: Springer Nature journal article supplement (https://www.springermedizin.de/resource/supplementary/12903_2010_180_MOESM2_ESM.pdf/9516294)

# Proportion of examined adolescents who were cariesfree by racial background

White, NH   Black, NH   Hispanics

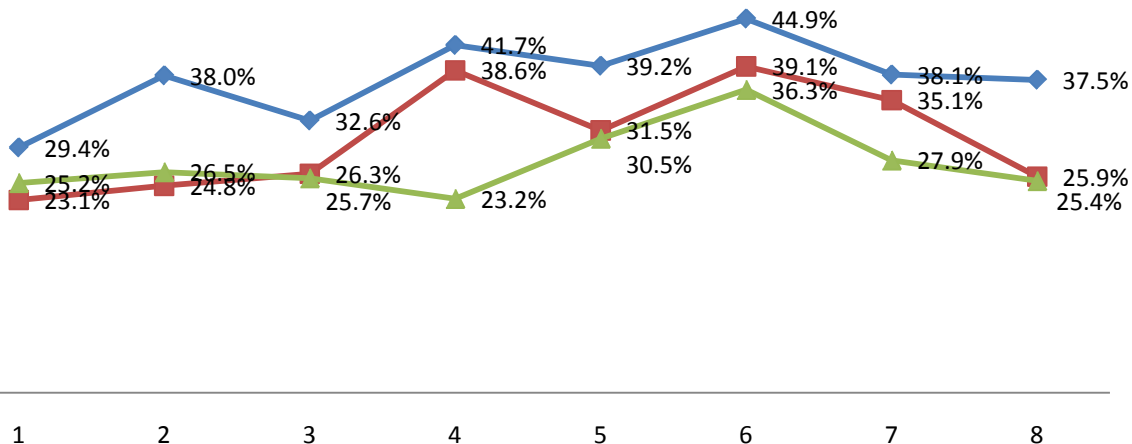

Supplement: MOESM2 [file 9516294]
